# Supplementary material for: Sequencing, de novo annotation and analysis of the first Anguilla anguilla transcriptome: EeelBase opens new perspectives for the study of the critically endangered european eel
Source: BMC Genomics. 2010 Nov 16;11:635. doi: 10.1186/1471-2164-11-635 (PMC3012609; doi:10.1186/1471-2164-11-635)
Supplement: Additional file 5 — Additional Table. Genes encoding heat shock proteins represented in EeelBase. The table summarizes a total of 92 GO terms associated to 26 contigs belonging to 11 different heat shock protein genes. The 55 non-redundant terms are also reported in a word cloud form, with character size proportional to the number of occurrences of the functional term. [file 1471-2164-11-635-S5.XLS]

## Sheet: Foglio2
eu_c8659	eu_c16095	eu_c11909	eu_c3123	eu_c23475	eu_c269	eu_c9078	eu_c2491	eu_c8406	eu_c2084	eu_c10606	eu_c10168	eu_c22311	eu_c10697	eu_c13047	eu2_c1290	eu_c20431	eu2_c422	eu2_lrc2572	eu_c6922	eu_c26288	eu_c5709	eu_c28342	eu_c26938	eu_c12132	eu_c19386
heat shock 70kda protein 5 (glucose-regulated 78kda)		heat shock protein 70			heat shock protein 8			heat shock protein 90-alpha 2		heat shock protein alpha class a member 1	activator of heat shock 90kda protein atpase homolog 1		heat shock 10kda protein 1 (chaperonin 10)	heat shock cognate 70 kda protein	heat shock factor binding protein 1				heat shock protein 30						d domain (prokaryotic heat shock protein) ( kd) (dnj-8)
perinuclear region of cytoplasm		ATP binding			ATP binding			ATP binding		response to stress	chaperone binding		mitochondrial matrix	ATPase activity, coupled	transcription corepressor activity				response to stress
ER overload response		camera type eye morphogenesis			response to stress			response to unfolded protein		cellular chaperone mediated protein complex assembly	response to stress		chaperone binding	regulation of cell cycle	response to stress
caspase inhibitor activity		nucleus			ATPase activity, coupled			cellular chaperone mediated protein complex assembly		Z disc	endoplasmic reticulum		response to unfolded protein	chaperone mediated protein folding requiring cofactor	nucleus
ER Golgi intermediate compartment		negative regulation of apoptosis			regulation of cell cycle			mitochondrial transport		nitric oxide synthase regulator activity	protein folding		protein folding	cytosol	negative regulation of transcription from RNA polymerase II promoter
nucleus		mitotic cell cycle			cytoplasmic part			melanosome		positive regulation of nitric oxide biosynthetic process	ATPase activator activity			unfolded protein binding
anti apoptosis		response to heat			protein binding			nitric oxide synthase regulator activity		cytosol
integral to endoplasmic reticulum membrane		unfolded protein binding			protein folding			positive regulation of nitric oxide biosynthetic process		muscle thick filament assembly
caspase complex		response to cadmium ion			chaperone mediated protein folding requiring cofactor			cytosol		TPR domain binding
cell surface		response to xenobiotic stimulus			cytosol			TPR domain binding		mitochondrial outer membrane translocase complex assembly
calcium ion binding		DNA replication initiation			unfolded protein binding			signal transduction		protein folding
unfolded protein binding		response to unfolded protein						mitochondrial outer membrane translocase complex assembly		protein homodimerization activity
protein binding		male meiosis						unfolded protein binding		nucleotide binding
ribosome binding		cell surface						protein refolding		sarcomerogenesis
endoplasmic reticulum lumen		spermatid development						protein homodimerization activity
integral to endoplasmic reticulum membrane		mitochondrion						sarcomerogenesis
nucleotide binding								Z disc
negative regulation of caspase activity								muscle thick filament assembly
cellular response to glucose starvation
